# Supplementary material
Source: publisher site journal article supplement (https://www.dovepress.com/article/446735)
Supplement: Supplementary file 1 [file get_supplementary_file.php]

Supplemental Table 1 Calculation methods of NPS

| **Factor** | **Threshold value** | **Score** |
| --- | --- | --- |
| Serum albumin (g/L) | ≥40 | 0 |
|  | ＜40 | 1 |
| Total cholesterol (mg/dl) | ＞180 | 0 |
|  | ≤180 | 1 |
| Neutrophil lymphocyte ratio | ≤2.96 | 0 |
|  | ＞2.96 | 1 |
| Lymphocyte monocyte ratio | ＞4.44 | 0 |
|  | ≤4.44 | 1 |

Abbreviations: NPS, Nutritional Prognostic Score.


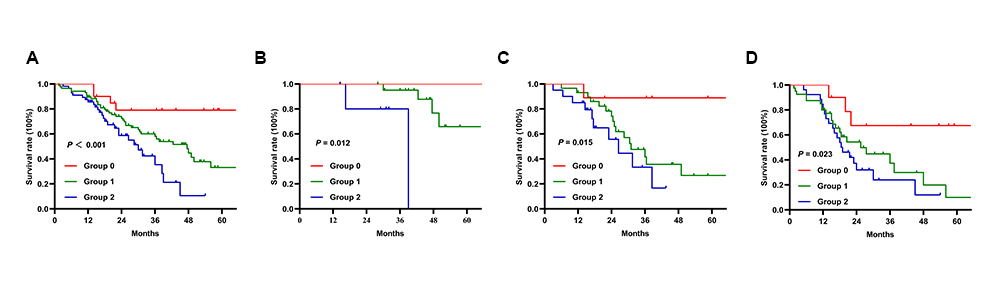


Supplemental Figure 1 The survival subgroup analysis of resected CCA patients by the Kaplan–Meier method. (A) The survival curves of Group based on NPS in all patients. (B) The survival curves of Group based on NPS in patients with stage I. (C) The survival curves of Group based on NPS in patients with stage II. (D) The survival curves of Group based on NPS in patients with stage III.

Abbreviations: CCA, cholangiocarcinoma; NPS, Nutritional Prognostic Score.
